# Supplementary material for: Synthesis of a figure-eight azahelicene dimer with high emission and CPL properties
Source: Royal Society of Chemistry journal article supplement (doi:10.1039/c6qo00629a), 2016-11-01
Supplement: c6qo00629a1.pdf [file c6qo00629a1.pdf]

## Supporting Information

# Synthesis of a figure-eight azahelicene dimer with high emission and CPL properties

Ayako Ushiyama,<sup>a</sup> Satoru Hiroto,<sup>a\*</sup> Junpei Yuasa,<sup>b</sup> Tsuyoshi Kawai<sup>b</sup> and Hiroshi  
Shinokubo<sup>a\*</sup>

*a Department of Applied Chemistry, Graduate School of Engineering,  
Nagoya University, Chikusa-ku, Nagoya 464-8603, Japan.*

*b Graduate School of Material Science, Nara Institute of Science and Technology  
(NAIST), Ikoma, 630-0192, Japan.*

E-mail: hiroto@apchem.nagoya-u.ac.jp; hshino@apchem.nagoya-u.ac.jp

### Table of Contents

|                                     |     |
|-------------------------------------|-----|
| Instrumentation and Materials ..... | S2  |
| Experimental Details .....          | S2  |
| Compound Data .....                 | S3  |
| NMR Spectra .....                   | S9  |
| HPLC chromatogram .....             | S15 |
| Cyclic Voltammograms .....          | S16 |
| Photophysical properties .....      | S17 |
| Theoretical calculations .....      | S18 |

## Instrumentation and Materials

$^1\text{H}$  NMR (500 MHz) and  $^{13}\text{C}$  NMR (126 MHz) spectra were recorded on a Bruker AVANCE III HD spectrometer, and chemical shifts were reported as the delta scale in ppm relative to  $\text{CHCl}_3$  ( $\delta = 7.260$  ppm), acetone- $d_5$  ( $\delta = 2.050$  ppm) for  $^1\text{H}$  NMR and  $\text{CDCl}_3$  ( $\delta = 77.16$  ppm), acetone- $d_6$  ( $\delta = 29.84$  ppm) for  $^{13}\text{C}$  NMR. UV/vis/NIR absorption spectra were recorded on a Shimadzu UV-2550 or JASCO V670 spectrometer. High-resolution mass spectra were recorded on a Bruker microTOF using positive mode ESI-TOF method for acetonitrile solutions. Unless otherwise noted, materials obtained from commercial suppliers were used without further purification.

## Experimental Details

### Synthesis of S2.

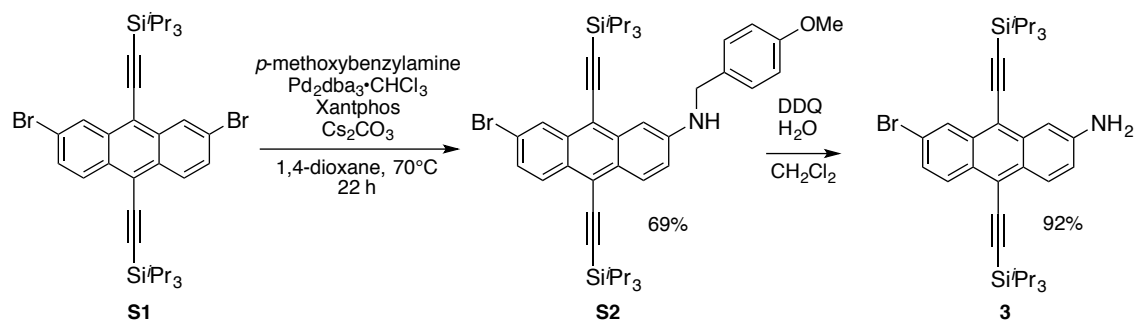

A two-necked flask containing 2,7-dibromo-9,10-bis(triisopropylsilyl)anthracene (**S1**) (326.4 mg, 0.47 mmol),  $\text{Pd}_2\text{dba}_3 \cdot \text{CHCl}_3$  (9.71 mg, 9.38  $\mu\text{mol}$ ), XantPhos (10.97 mg, 19.0  $\mu\text{mol}$ ), and  $\text{Cs}_2\text{CO}_3$  (204.1 mg, 0.63 mmol) was evacuated and then refilled with  $\text{N}_2$ . To the flask, 4.7 mL of dry 1,4-dioxane and 4-methoxybenzylamine (73  $\mu\text{L}$ , 0.59 mmol) were added. The mixture was stirred at

70°C for 22 h. The resulting mixture was filtered over a pad of Celite (CHCl<sub>3</sub> as an eluent) and the solvent was evaporated in vacuo. The mixture was purified by silica-gel column chromatography (CHCl<sub>3</sub>/hexane as an eluent) to afford **S2** (242 mg, 0.32 mmol) in 69% yield as orange solid. <sup>1</sup>H NMR (CDCl<sub>3</sub>): δ = 8.73 (t, 1H), 8.46–8.47 (dd, *J*<sub>1</sub> = 8.5 Hz, *J*<sub>2</sub> = 0.5 Hz, 1H), 8.40–8.42 (d, *J* = 9.0 Hz, 1H), 7.56 (d, *J* = 2.0 Hz, 1H), 7.50–7.52 (dd, *J*<sub>1</sub> = 8.5 Hz, *J*<sub>2</sub> = 1.5 Hz, 1H), 7.35–7.37 (d, *J* = 8.5 Hz, 2H), 7.03–7.05 (dd, *J*<sub>1</sub> = 9.5 Hz, *J*<sub>2</sub> = 2.5 Hz, 1H), 6.91–6.93 (d, *J* = 9.0 Hz, 2H), 3.83 (s, 3H), 1.24–1.28 (m, 42H, TIPS) ppm; <sup>13</sup>C NMR (CDCl<sub>3</sub>) δ = 159.11, 146.56, 135.22, 133.99, 130.31, 129.06, 129.02, 128.71, 128.56, 128.35, 128.12, 121.54, 121.47, 121.54, 121.47, 118.89, 114.14, 113.58, 104.18, 104.02, 103.79, 103.03, 100.81, 55.30, 47.53, 18.90, 18.86, 11.47, 11.45 ppm; HR-MS(ESI-MS): *m/z* = 752.3282, calcd for (C<sub>44</sub>H<sub>58</sub>BrNOSi<sub>2</sub>)<sup>+</sup> = 752.3313 [(M + H)<sup>+</sup>].

### Synthesis of **3**.

DDQ (65.4 mg, 0.288 mmol) was added to a mixture of **S2** (216 mg, 0.287 mmol) in CH<sub>2</sub>Cl<sub>2</sub> (45.6 mL) and H<sub>2</sub>O (0.37 mL). The mixture was stirred at room temperature for 1 h. The reaction was quenched with aqueous Na<sub>2</sub>S<sub>2</sub>O<sub>3</sub>, and the mixture was extracted with CHCl<sub>3</sub>. The organic layer was washed with water, dried over anhydrous Na<sub>2</sub>SO<sub>4</sub>, and concentrated in vacuo. The residue was purified by silica-gel column chromatography (CHCl<sub>3</sub>/hexane as an eluent) to afford **3** in 92% yield. <sup>1</sup>H NMR (CDCl<sub>3</sub>): δ = 8.73 (d, *J* = 1.5 Hz, 1H), 8.43–8.45 (d, *J* = 9.0 Hz, 1H), 8.39–8.41 (d, *J* = 9.0 Hz, 1H), 7.64 (d, *J* = 2.0 Hz, 1H), 7.52–7.54 (dd, *J*<sub>1</sub> = 9.0 Hz, *J*<sub>2</sub> = 2.0 Hz, 1H), 7.10–

7.13 (dd,  $J_1 = 9.0$  Hz,  $J_2 = 2.5$  Hz, 1H), 4.11 (s, 2H), 1.24–1.28 (m, 42H, TIPS) ppm;  $^{13}\text{C}$  NMR ( $\text{CDCl}_3$ )  $\delta = 145.33, 134.69, 133.91, 129.05, 129.00, 128.81, 128.66, 128.09, 121.62, 121.09, 113.84, 105.54, 104.49, 104.29, 103.49, 102.94, 18.90, 18.86, 11.56, 11.47$  ppm; HR-MS(ESI-MS):  $m/z = 632.2729$ , calcd for  $(\text{C}_{36}\text{H}_{50}\text{BrNSi}_2)^+ = 632.2738$   $[(\text{M} + \text{H})^+]$ .

### Synthesis of 4

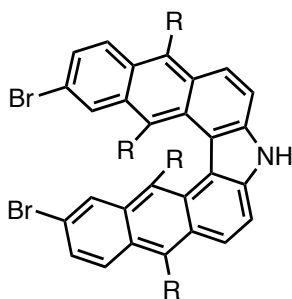

A two-necked flask containing **3** (50.9 mg, 0.079 mmol) was evacuated and then refilled with  $\text{N}_2$ . To the flask, 26 mL of dry  $\text{CHCl}_3$  was added. To the resulting solution, a solution of DDQ (55.8 mg, 0.25 mmol) in dry  $\text{CHCl}_3$  (8 mL) was added and the mixture was stirred at room temperature for 3 h. The reaction was quenched with aqueous  $\text{Na}_2\text{S}_2\text{O}_3$  and the mixture was extracted with  $\text{CHCl}_3$ . The organic layer was washed with water, dried over anhydrous  $\text{Na}_2\text{SO}_4$ , and concentrated in vacuo. The mixture was purified by silica-gel column chromatography ( $\text{CHCl}_3$ /hexane as an eluent) to afford **4** (30.3 mg, 0.024 mmol) in 60% yield.  $^1\text{H}$  NMR ( $\text{CDCl}_3$ ):  $\delta = 9.18$  (s, 1H NH), 8.91 (d,  $J = 1.8$  Hz, 2H), 8.62–8.65 (d,  $J = 9.0$  Hz, 2H), 8.52–8.55 (d,  $J = 9.0$  Hz, 2H), 7.74–7.77 (d,  $J = 9.0$  Hz, 2H), 7.61–7.68 (dd,  $J_1 = 5.6$  Hz,  $J_2 = 2.1$  Hz), 1.26–1.31 (m, 42H, TIPS), 0.62–0.63 (d,  $J = 7.5$  Hz, 18H, TIPS), 0.52–0.55 (d,  $J = 7.5$  Hz, 18H,

TIPS), 0.11–0.23 (m, 6H, TIPS) ppm;  $^{13}\text{C}$  NMR ( $\text{CDCl}_3$ )  $\delta$  = 135.48, 133.36, 130.79, 130.52, 129.95, 129.54, 129.36, 128.58, 125.97, 121.33, 118.43, 117.95, 117.57, 114.59, 109.30, 106.35, 103.92, 103.80, 18.93, 18.46, 18.28, 11.64, 11.59 ppm; HR-MS(ESI-MS):  $m/z$  = 1244.4952, calcd for  $(\text{C}_{72}\text{H}_{95}\text{Br}_2\text{NSi}_4)^+ = 1244.4981$  [(M + H) $^+$ ].

### Synthesis of **5**

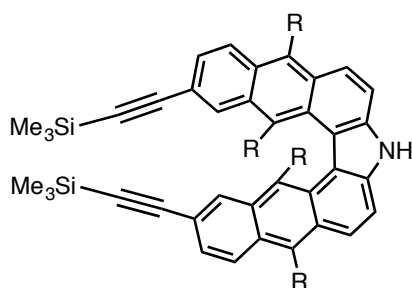

A Schlenk flask containing **4** (53.7 mg, 43.1  $\mu\text{mol}$ ),  $\text{Pd}(\text{PhCN})_2\text{Cl}_2$  (3.31 mg, 8.63  $\mu\text{mol}$ ),  $(t\text{Bu}_3\text{PH})\text{BF}_4$  (5.04 mg, 17.3  $\mu\text{mol}$ ), and  $\text{CuI}$  (1.63 mg, 8.56  $\mu\text{mol}$ ) was evacuated and then refilled with  $\text{N}_2$ . To the flask, trimethylsilylacetylene (0.12 mL, 0.86 mmol), 2 mL of dry 1,4-dioxane, and 3 mL of distilled diisopropylamine were added. The mixture was stirred at 100  $^\circ\text{C}$  for 24 h. The reaction was quenched with water and the mixture was extracted with EtOAc. The organic layer was washed with water and dried over anhydrous  $\text{Na}_2\text{SO}_4$ , and concentrated in vacuo. The residue was purified by silica-gel column chromatography ( $\text{CHCl}_3$ /hexane as an eluent) to afford **5** (30.3 mg, 0.024 mmol) in 91% yield.  $^1\text{H}$  NMR ( $\text{CDCl}_3$ ):  $\delta$  9.10 (s, 1H, NH), 8.89 (d,  $J$  = 0.9 Hz, 2H), 8.61–8.64 (d,  $J$  = 9.0 Hz, 2H), 8.56–8.59 (d,  $J$  = 9.0 Hz, 2H), 7.71–7.74 (d,  $J$  = 9.0 Hz, 2H), 7.58–7.61 (dd,  $J_1$  = 9 Hz,  $J_2$  = 1.5 Hz, 2H), 1.26–1.33 (m, 42H, TIPS), 0.59–

0.61 (d,  $J = 7.5$  Hz, 18H, TIPS), 0.53–0.55 (d,  $J = 7.5$  Hz, 18, TIPS), 0.26 (s, 18H), 0.17–0.22 (m, 6H, TIPS) ppm;  $^{13}\text{C}$  NMR ( $\text{CDCl}_3$ )  $\delta = 136.15, 133.15, 132.29, 131.32, 131.22, 131.06, 128.46, 127.57, 126.49, 121.67, 119.39, 118.27, 117.94, 115.39, 109.95, 106.97, 106.23, 104.49, 104.37, 95.64, 19.30, 18.85, 18.67, 12.45, 12.23, 12.15, 11.92, 0.214$  ppm; HR-MS(ESI-MS):  $m/z = 1280.7512$ , calcd for  $(\text{C}_{82}\text{H}_{113}\text{NSi}_6)^+ = 1280.7561$   $[(\text{M} + \text{H})^+]$ .

### Synthesis of **6**.

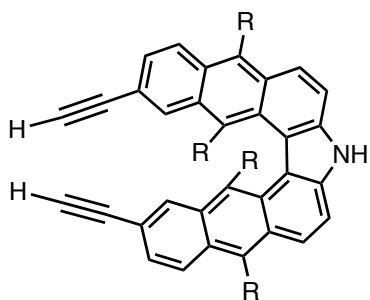

A two-neck flask containing **5** (52.7 mg, 41.0  $\mu\text{mol}$ ) and  $\text{K}_2\text{CO}_3$  (85.0 mg, 0.62 mmol) were evacuated and then refilled with  $\text{N}_2$ . To the flask, 4.6 mL of THF and 4.6 mL of MeOH were added. The mixture was stirred at 60  $^\circ\text{C}$  for 13 h. The reaction was quenched with aqueous  $\text{H}_2\text{O}$  and the mixture was extracted with EtOAc. The organic layer was washed with water, dried over anhydrous  $\text{Na}_2\text{SO}_4$ , and concentrated in vacuo. The mixture was purified by silica-gel column chromatography ( $\text{CHCl}_3$ /hexane as an eluent) to afford **6** (41.0 mg, 36.1  $\mu\text{mol}$ ) in 88% yield.  $^1\text{H}$  NMR ( $\text{CDCl}_3$ ):  $\delta$  9.14 (s, 1H, NH), 8.91 (d,  $J = 1.0$  Hz, 2H), 8.64–8.65 (d,  $J = 9.0$  Hz, 2H), 8.60–8.61 (d,  $J = 9.0$  Hz, 2H), 7.75–7.77 (d,  $J = 9.0$  Hz, 2H), 7.61–7.63 (dd,  $J_1 = 9$  Hz,  $J_2 = 1.5$  Hz, 2H), 3.16 (s, 2H), 1.29–1.33 (m, 42H, TIPS), 0.56–0.58 (d,  $J = 7.5$  Hz, 18H, TIPS), 0.51–0.53 (d,  $J =$

7.5 Hz, 18, TIPS), 0.15–0.21 (m, 6H, TIPS) ppm;  $^{13}\text{C}$  NMR ( $\text{CDCl}_3$ )  $\delta$  = 135.35, 132.69, 130.83, 130.70, 130.58, 128.27, 126.95, 125.84, 119.97, 119.12, 117.59, 114.69, 109.52, 106.27, 103.99, 103.49, 84.39, 77.67, 18.93, 18.41, 18.22, 11.57 ppm; UV/vis ( $\text{CH}_2\text{Cl}_2$ ):  $\lambda_{\text{max}}$  ( $\epsilon$  [ $\text{M}^{-1}\text{cm}^{-1}$ ]) = 282.5 (110000), 289.5 (110000), 316 (67000), 357.5 (37000), 395 (23000), 487 (29000), 519.5 (45000); FL ( $\text{CH}_2\text{Cl}_2$ )  $\lambda_{\text{em}}$  [nm] = 578 ( $\lambda_{\text{ex}}$  = 400nm); HR-MS(ESI-MS):  $m/z$  = 1136.6724, calcd for  $(\text{C}_{76}\text{H}_{97}\text{NSi}_4)^+ = 1136.6771$  [(M + H) $^+$ ].

### Synthesis of **2**.

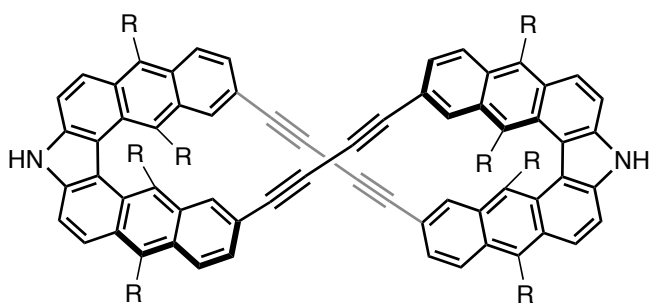

A test tube containing  $\text{Cu}(\text{OAc})_2$  (53.2 mg, 0.29 mmol) was dropped a solution of **6** (16.7 mg, 14.7  $\mu\text{mol}$ ) in the pyridine (1.77 mL). The mixture was stirred at room temperature for 40 h. The mixture was filtered over a pad of silica-gel column ( $\text{CH}_2\text{Cl}_2$  as an eluent) and the solvent was evaporated in vacuo. The mixture was purified by silica-gel column chromatography ( $\text{CHCl}_3$ /hexane as an eluent) to afford **2** (10.8 mg, 4.76  $\mu\text{mol}$ ) in 64% yield.  $^1\text{H}$  NMR ( $\text{CDCl}_3$ ):  $\delta$  = 9.21 (s, 2H, NH), 9.01 (d,  $J$  = 1.0 Hz, 4H), 8.65–8.67 (d,  $J$  = 9.0 Hz, 4H), 8.61–8.62 (d,  $J$  = 9.0 Hz, 4H), 7.77–7.79 (d,  $J$  = 9.0 Hz, 4H), 7.64–7.66 (dd,  $J_1$  = 8.5 Hz,  $J_2$  = 1.5 Hz, 4H), 1.30–1.33 (m, 84H, TIPS), 0.59–0.61 (d,  $J$  = 7.5 Hz, 36H, TIPS), 0.53–0.55 (d,  $J$  = 7.5 Hz, 36, TIPS), 0.19–0.23 (m, 12H,

TIPS) ppm;  $^{13}\text{C}$  NMR ( $\text{CDCl}_3$ )  $\delta$  = 135.60, 134.32, 132.00, 131.22, 130.81, 130.74, 128.20, 127.13, 126.08, 120.11, 119.65, 117.89, 117.73, 114.98, 110.71, 106.53, 104.17, 103.65, 82.83, 75.30, 19.08, 18.55, 18.41, 11.74, 11.70 ppm; UV/vis ( $\text{CH}_2\text{Cl}_2$ ):  $\lambda_{\text{max}}$  ( $\epsilon$  [ $\text{M}^{-1}\text{cm}^{-1}$ ]) = 263 (99000), 300 (180000), 338 (180000), 406 (45000), 501 (44000), 535.5 (64000); FL ( $\text{CH}_2\text{Cl}_2$ )  $\lambda_{\text{em}}$  [nm] = 588 ( $\lambda_{\text{ex}}$  = 420nm) ; HR-MS(ESI-MS):  $m/z$  = 2268.3073, calcd for  $(\text{C}_{152}\text{H}_{190}\text{N}_2\text{Si}_8)^+$  = 2268.3156 [(M + H) $^+$ ].



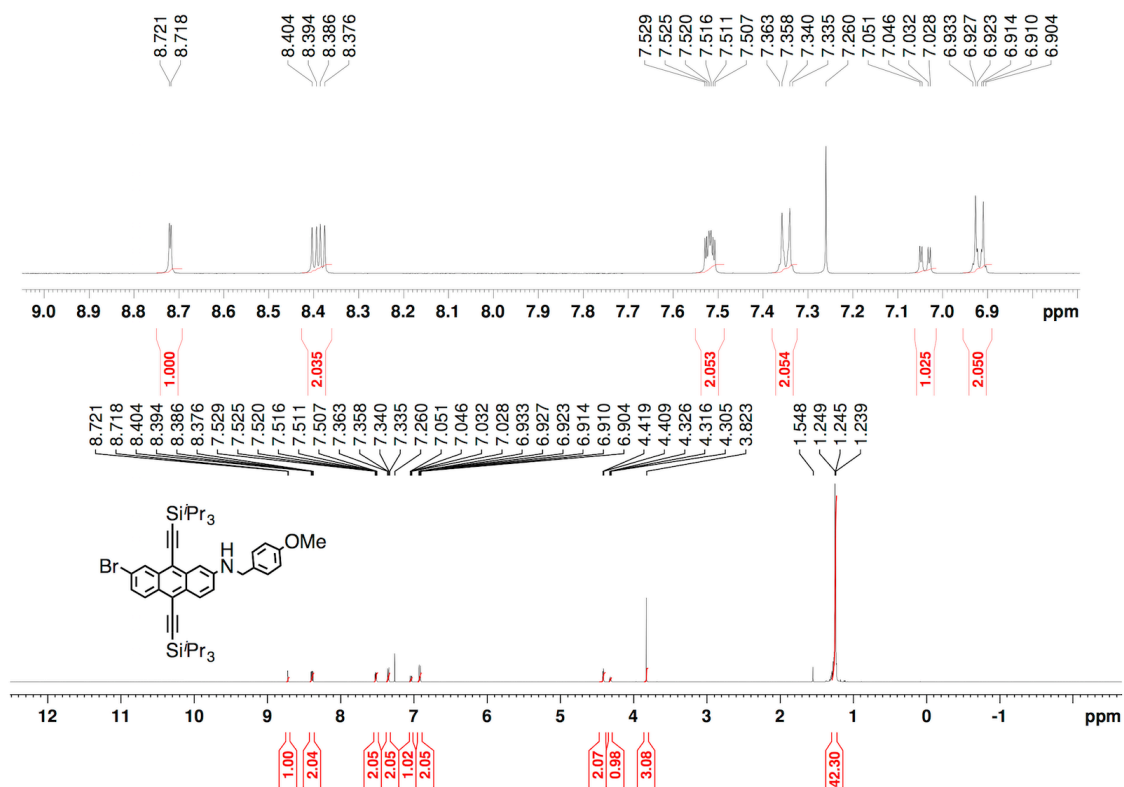

Figure S1. <sup>1</sup>H NMR spectrum of S2 in CDCl<sub>3</sub>.

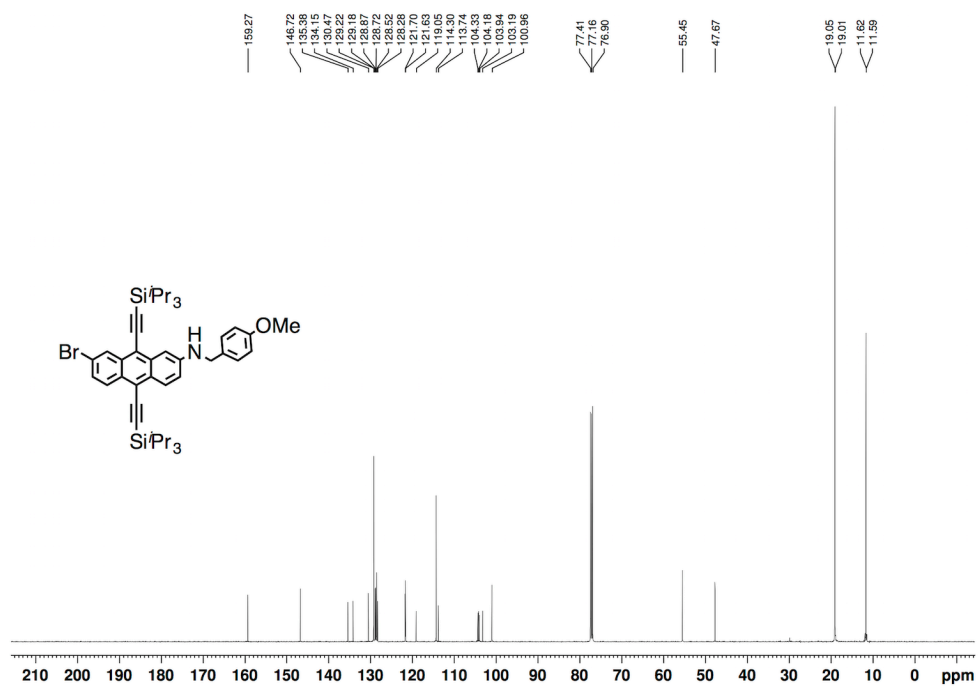

Figure S2. <sup>13</sup>C NMR spectrum of S2 in CDCl<sub>3</sub>.

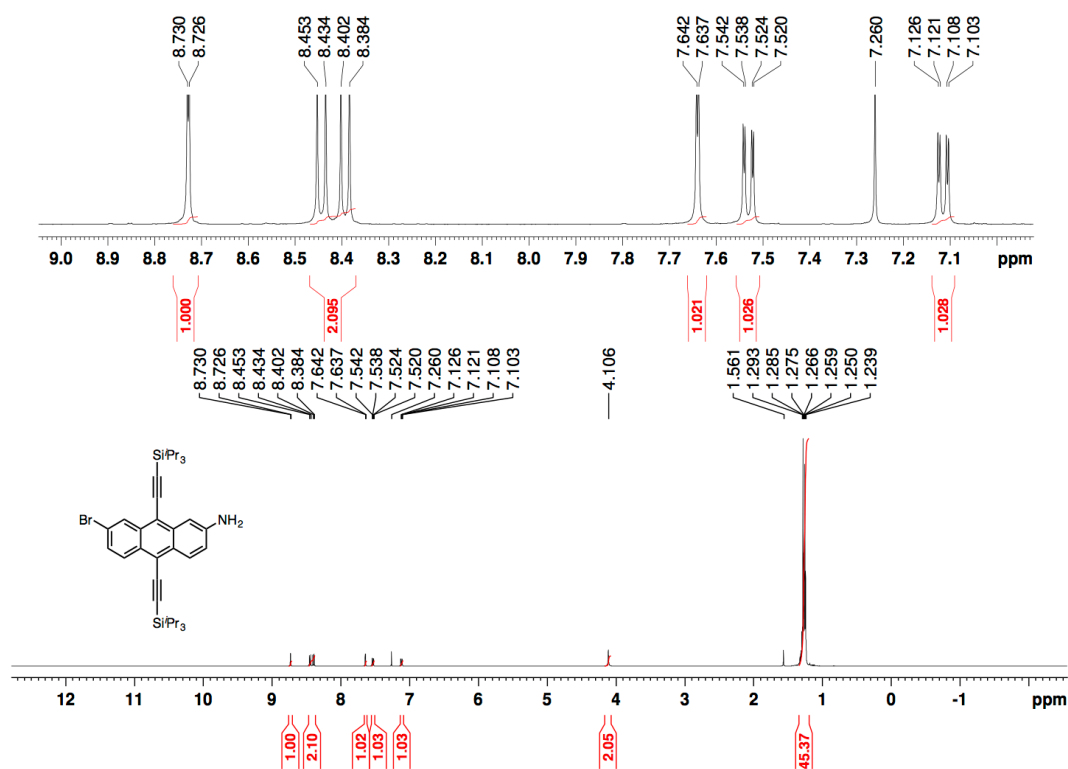

Figure S3. <sup>1</sup>H NMR spectrum of 3 in CDCl<sub>3</sub>.

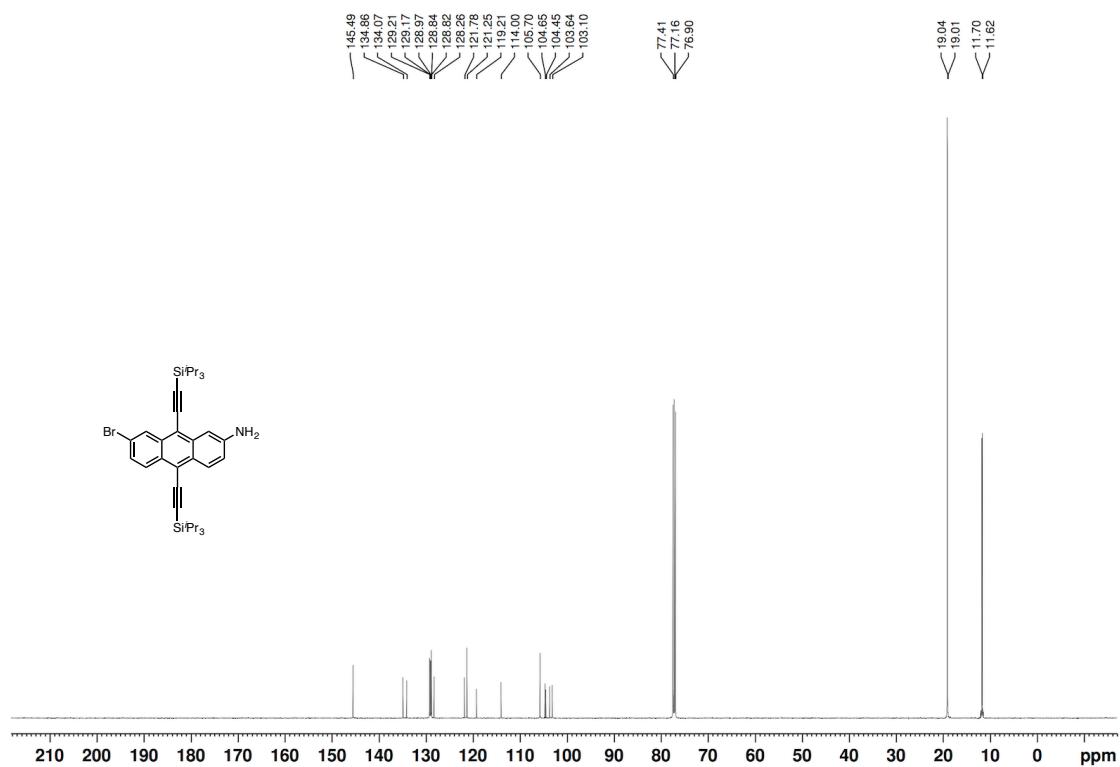

Figure S4. <sup>13</sup>C NMR spectrum of 3 in CDCl<sub>3</sub>.

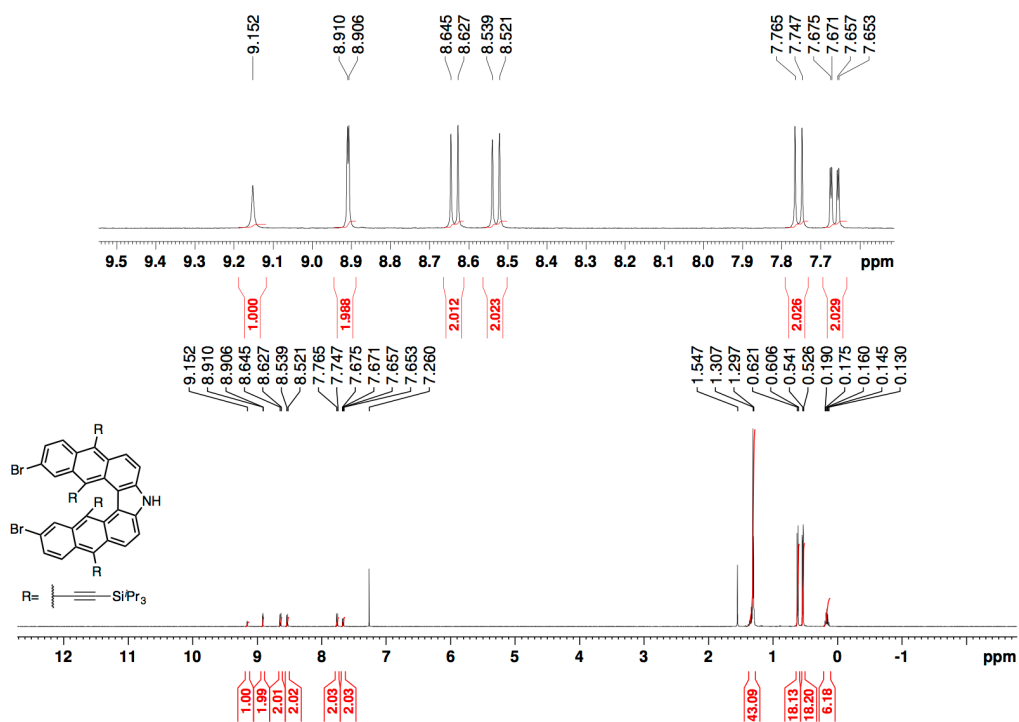

Figure S5. <sup>1</sup>H NMR spectrum of 4 in CDCl<sub>3</sub>.

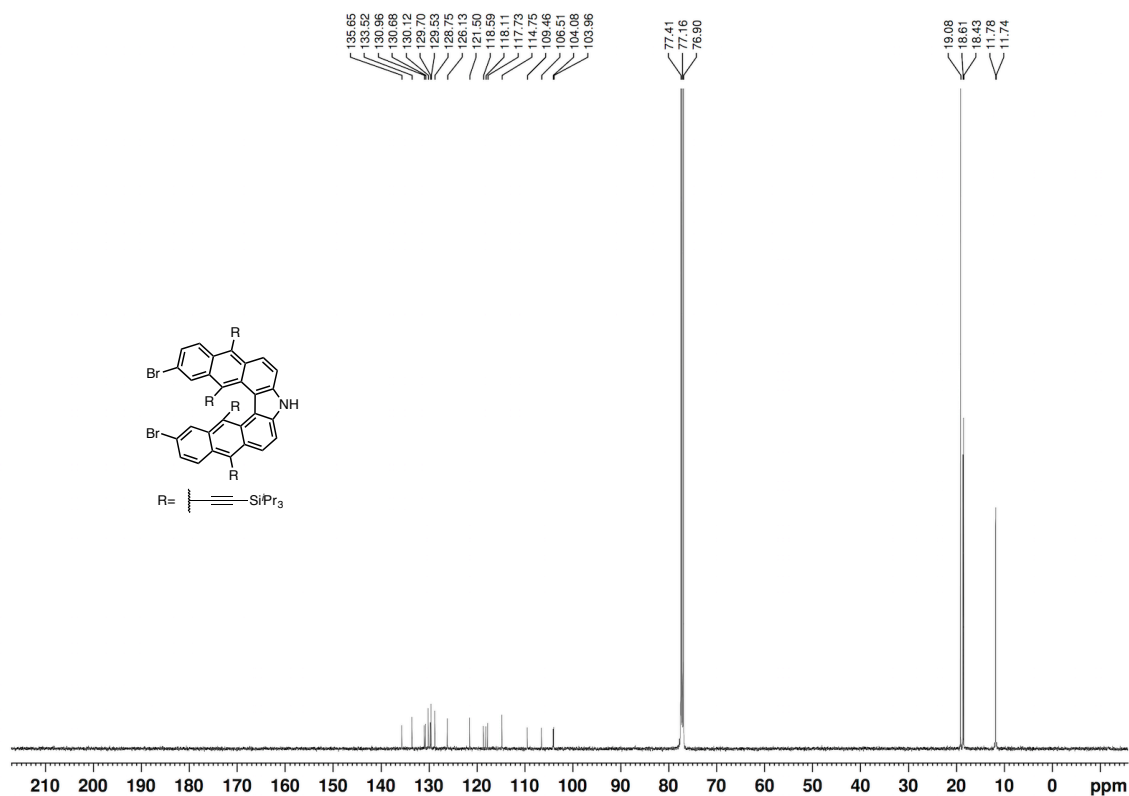

Figure S6. <sup>13</sup>C NMR spectrum of 4 in CDCl<sub>3</sub>.

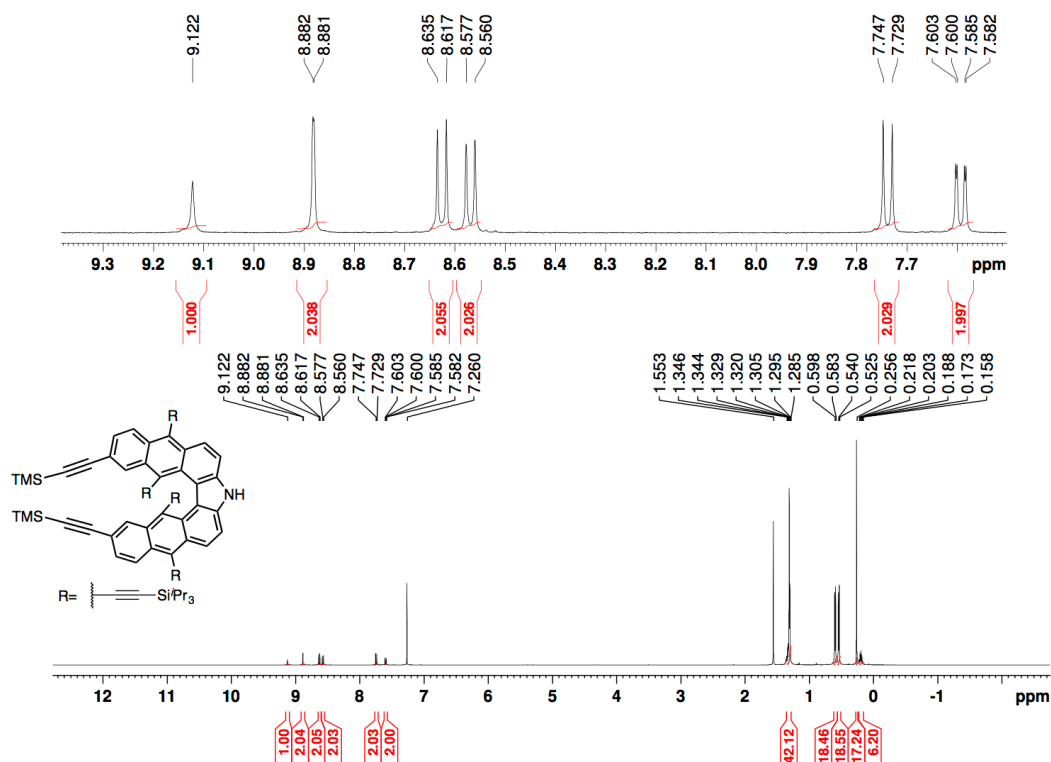

Figure S7. <sup>1</sup>H NMR spectrum of **5** in CDCl<sub>3</sub>.

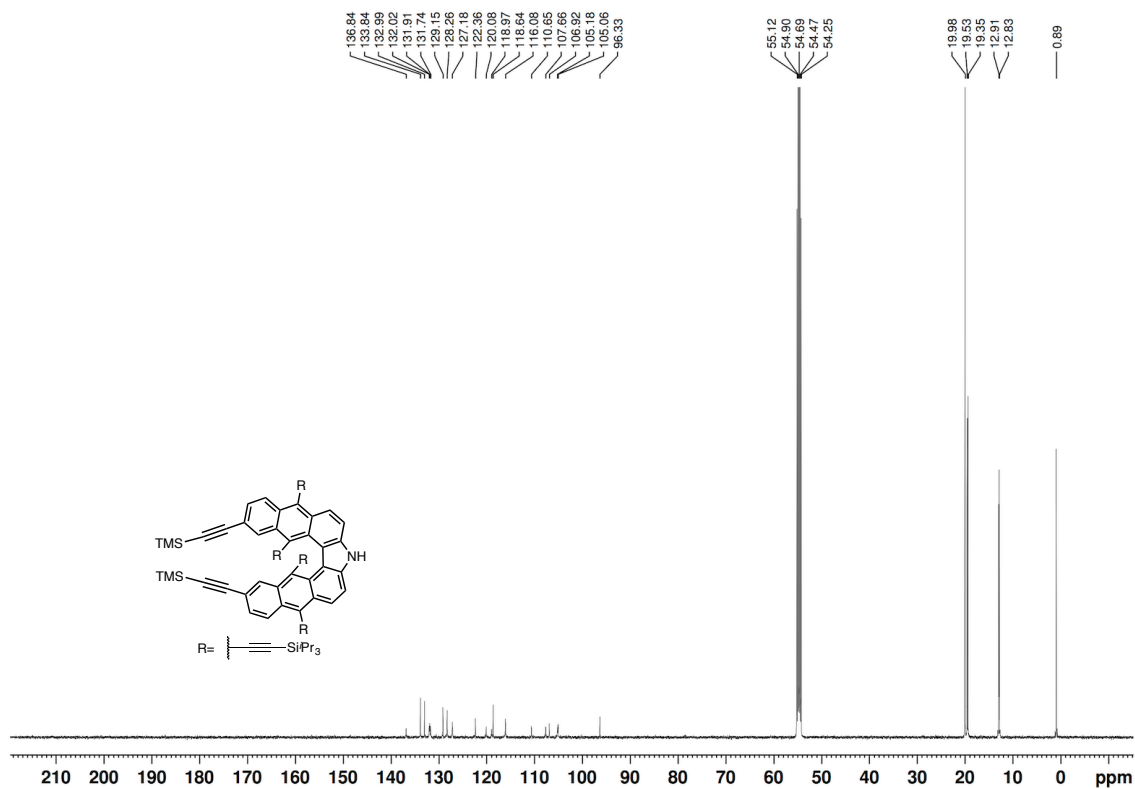

Figure S8. <sup>13</sup>C NMR spectrum of **5** in CD<sub>2</sub>Cl<sub>2</sub>.

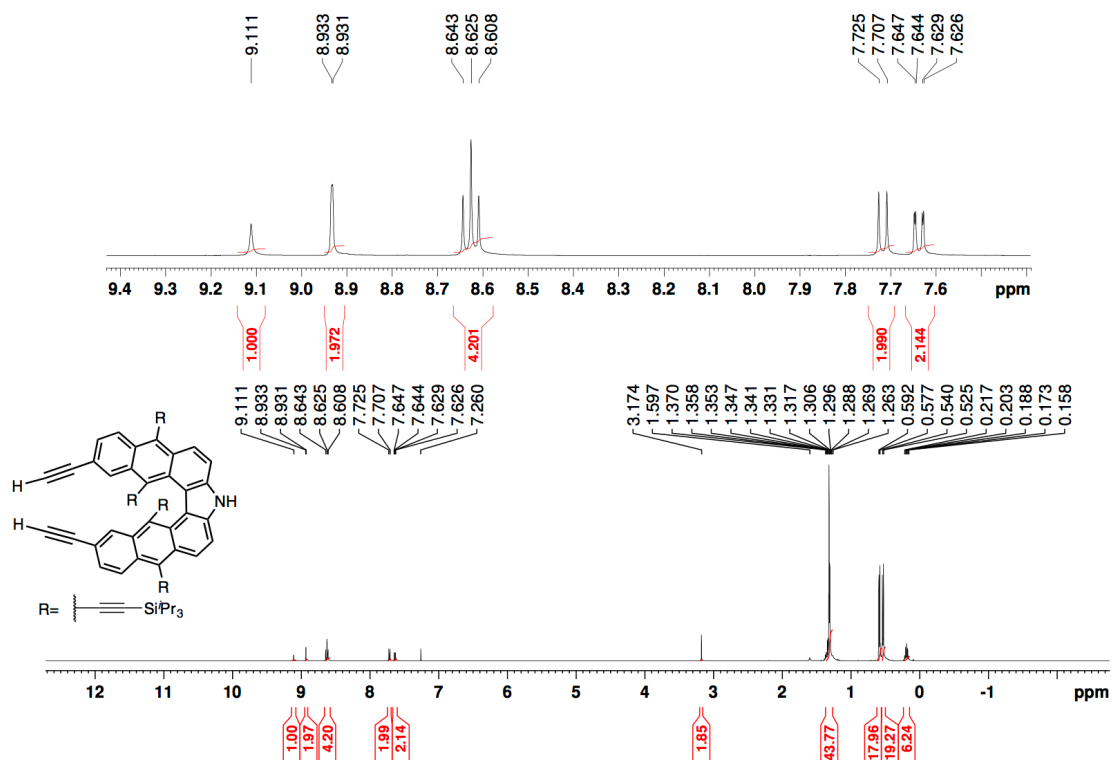

Figure S9. <sup>1</sup>H NMR spectrum of **6** in CDCl<sub>3</sub>.

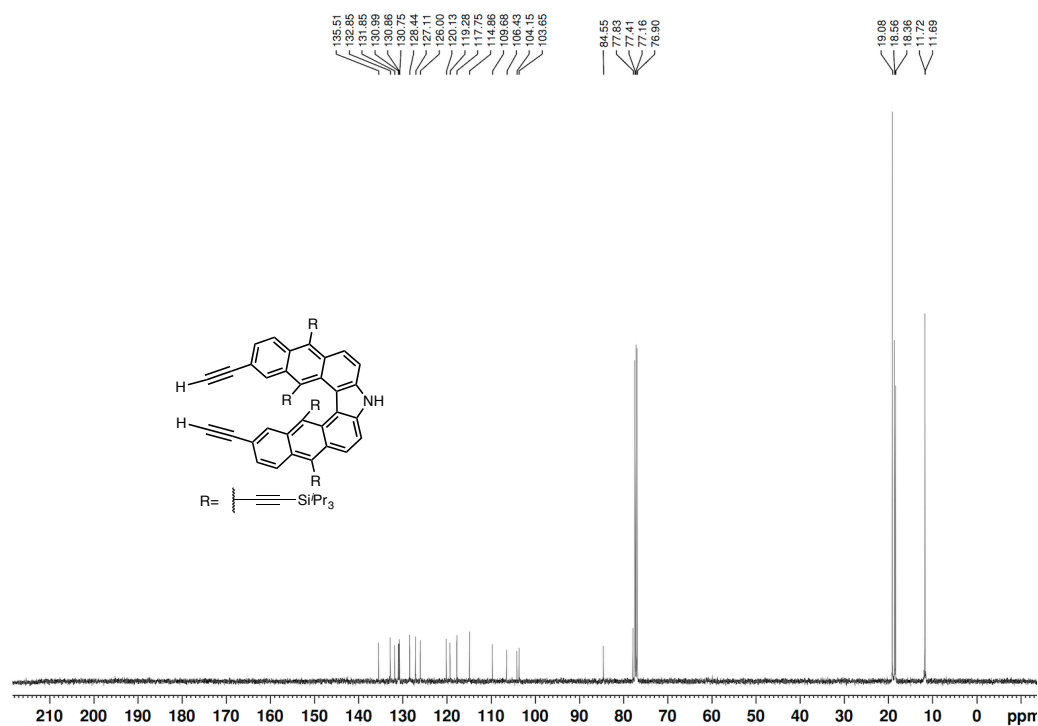

Figure S10. <sup>13</sup>C NMR spectrum of **6** in CDCl<sub>3</sub>.

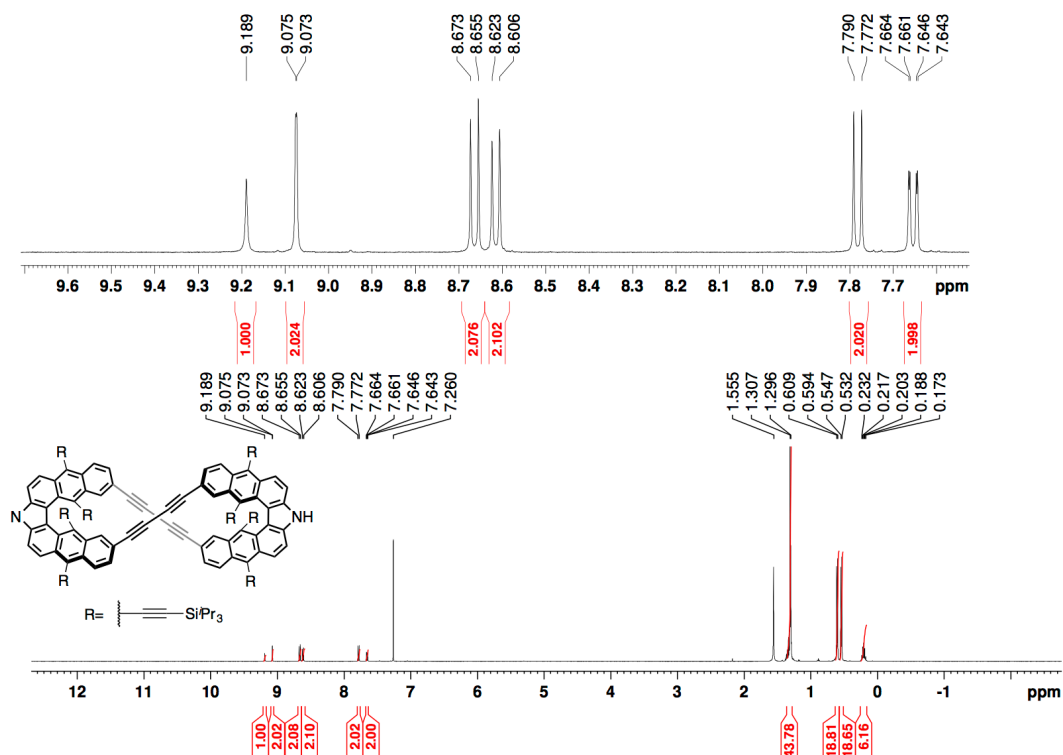

Figure S11. <sup>1</sup>H NMR spectrum of **2** in CDCl<sub>3</sub>.

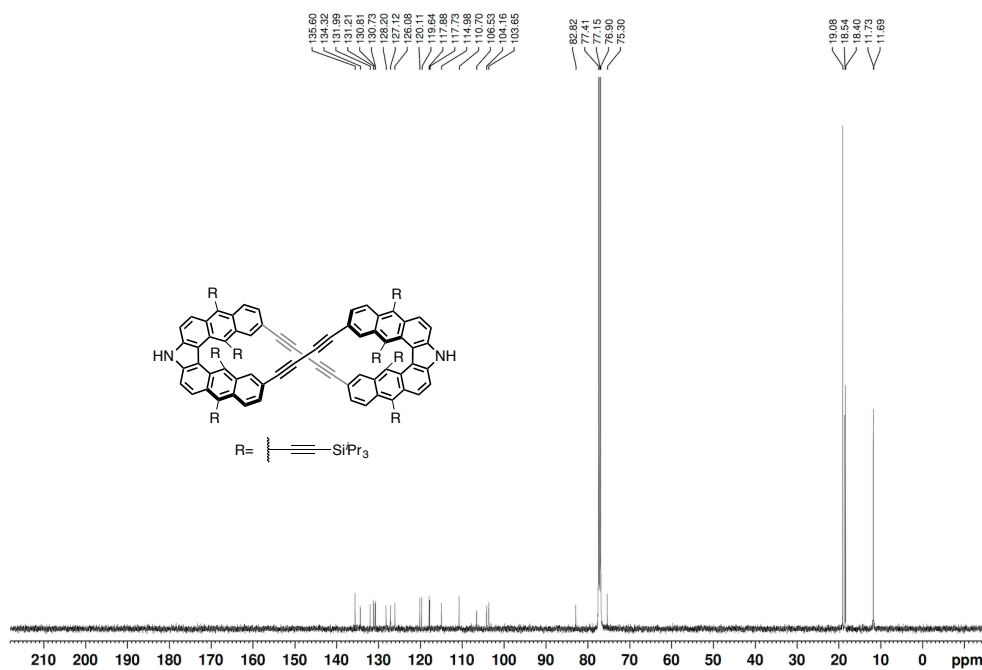

Figure S12. <sup>13</sup>C NMR spectrum of **2** in CDCl<sub>3</sub>.

### Optical resolution

Optical resolution of **6** was performed by chiral column chromatography equipped with CHIRALPAK IA®.

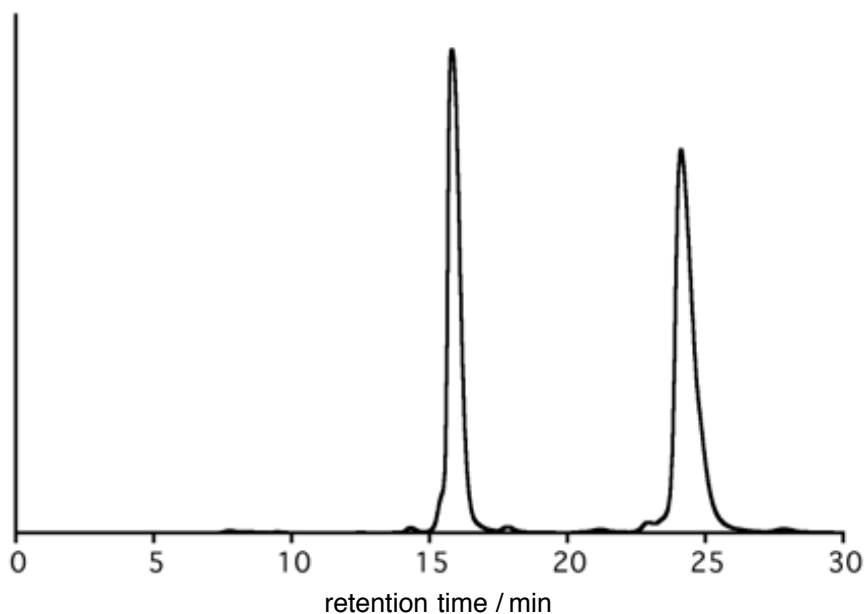

**Fig. S13** Chromatograms of (±)-**6**.

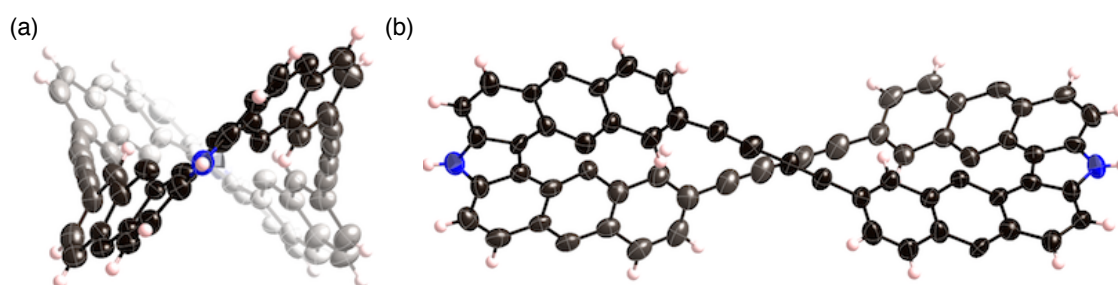

**Fig. S14** Preliminary X-ray crystal structure of **2**. (a) Side view and (b) Front view. The thermal ellipsoids are scaled at 50% probability level. Triisopropylethynyl groups are omitted for clarity.  $R_1 = 0.1475$ ,  $wR = 0.4128$ ,  $GOF = 1.172$ .

### Cyclic Voltammetry

Cyclic voltammograms of **2** and **6** were recorded on ALS electrochemical analyser 612C. Measurements were performed in freshly distilled THF with tetrabutylammonium hexafluorophosphate as electrolyte. A three electrode system was used and consisted of a platinum working electrode, a platinum wire and Ag/AgClO<sub>4</sub> as the reference electrode. All potentials are referenced to the potential of ferrocene/ferrocenium cation couple.

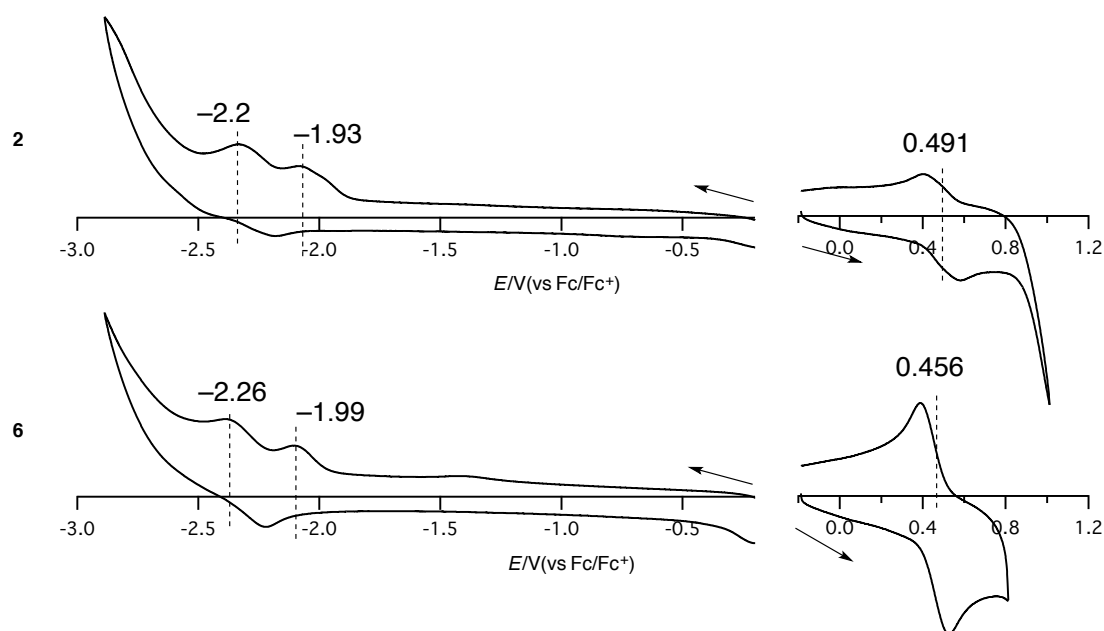

**Fig. S15** Cyclic voltammograms of **2** and **6**.



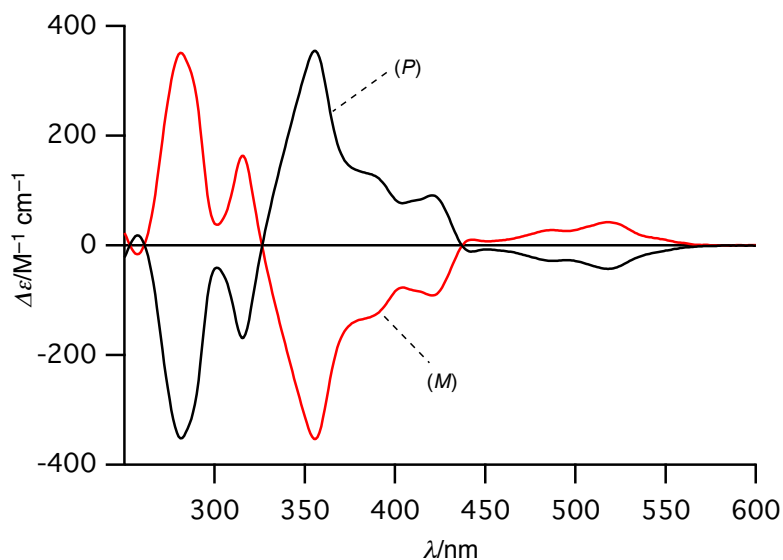

**Fig. S16** CD spectra of (P) and (M)-**6** in CH<sub>2</sub>Cl<sub>2</sub>.

#### Time-Resolved Fluorescence Measurement

Time-resolved fluorescence spectra of **2** and **6** were measured on a Hamamatsu Quantaurs-tau C11367-21. All the decay profiles were fitted reasonably well using a single exponential function.

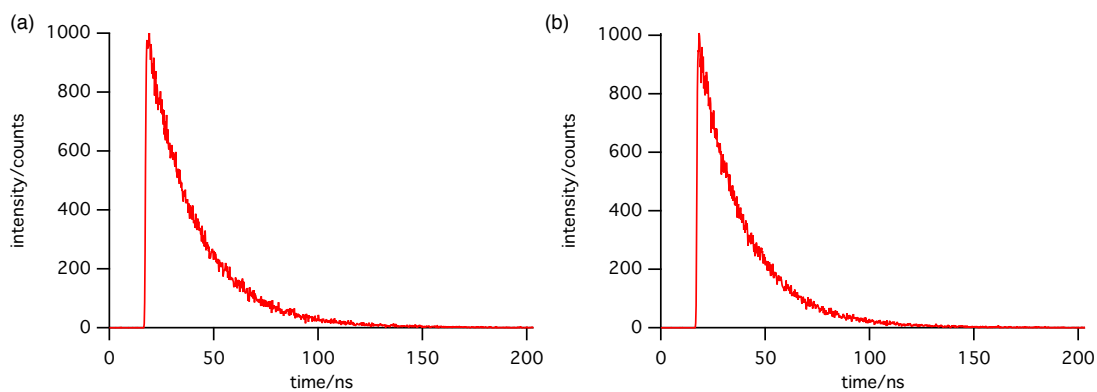

**Fig S17.** Fluorescence decay profiles of (a) **6** (left) and (b) **2** in CH<sub>2</sub>Cl<sub>2</sub> at ambient temperature ( $\lambda_{\text{ex}} = 405$  nm). ( $\tau = 22.9$  ns,  $A = 0.240$ ,  $\chi^2 = 1.216$  for **6**,  $\tau = 21.5$  ns,  $A = 0.234$ ,  $\chi^2 = 1.134$  for **2**).

### Theoretical calculations

All calculations were carried out using the Gaussian 09 program. Geometries of **2** and **6** were optimized by the DFT method at the B3LYP/6-31G(d) level. Molecular orbitals of **2** and **6** were calculated at the CAM-B3LYP level with the same basis sets. The oscillator strengths of **6** were calculated by the time-dependent (TD) DFT method at the CAM-B3LYP/6-31G(d) level of theory.

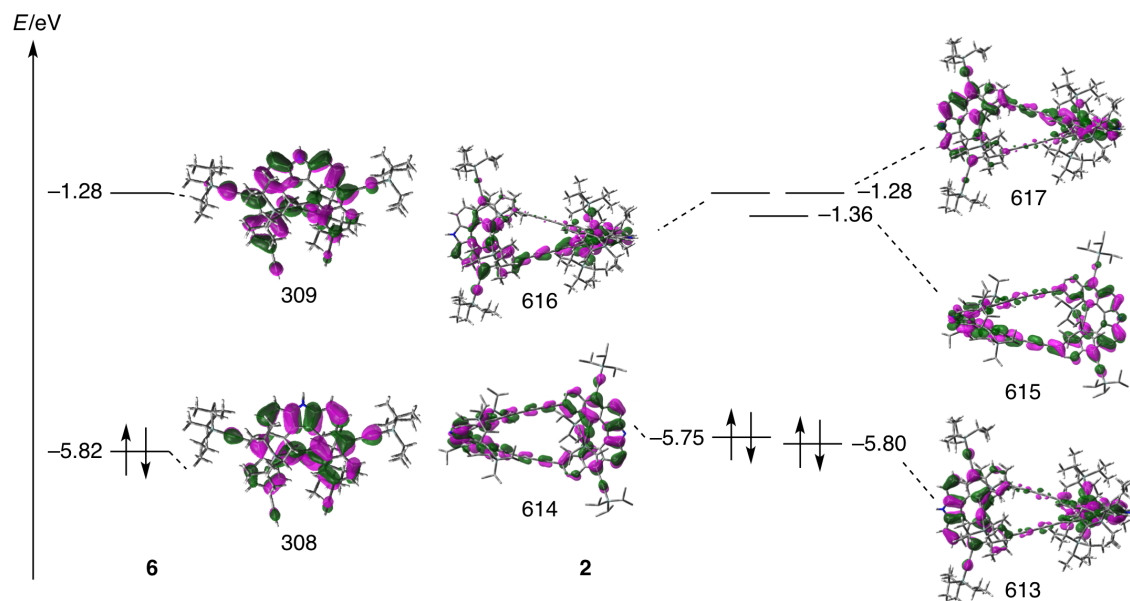

**Fig. S18** MO diagrams of **2** and **6**.
